# Supplementary material for: COVID-19 Symptoms and Diagnoses among a Sociodemographically Diverse Cohort of Children from New York City: Lessons from the First Wave, Spring 2020
Source: MDPI journal article supplement (doi:10.3390/ijerph182211886), 2021-11-12
Supplement: s1 [file s1]

**ijerph-1410331COVID-19 Symptoms and Diagnoses among a  
Sociodemographically Diverse Cohort of Children from New York City: Lessons  
from the First Wave, Spring 2020**

Table S1. Characteristics of the first 2000 NYU CHES participants with live deliveries vs. participants in the COVID-19 substudy

|                    | NYU CHES<br>N=2,000 | COVID-19<br>substudy<br>N=1,560 |
|--------------------|---------------------|---------------------------------|
| Maternal age       | 31.8 (5.6)          | 32.1 (5.6)                      |
| Race/ethnicity     |                     |                                 |
| Hispanic           | 49%                 | 50%                             |
| Non-Hispanic White | 33%                 | 33%                             |
| Non-Hispanic Black | 6%                  | 5%                              |
| Non-Hispanic Asian | 9%                  | 9%                              |
| Non-Hispanic Other | 1%                  | 1%                              |
| Multiple           | 2%                  | 2%                              |
| Marital status     |                     |                                 |
| Married/partnered  | 88%                 | 88%                             |
| Divorced/separated | 2%                  | 2%                              |
| Single/widowed     | 10%                 | 9%                              |
| Education          |                     |                                 |
| HS or less         | 32%                 | 33%                             |
| Some college       | 12%                 | 11%                             |
| Associate          | 5%                  | 4%                              |
| Bachelor's         | 23%                 | 24%                             |
| Postgraduate       | 28%                 | 28%                             |
| Income             |                     |                                 |
| <\$30K             | 17%                 | 18%                             |
| \$30 to <\$50K     | 8%                  | 7%                              |
| \$50 to <\$75K     | 7%                  | 6%                              |
| \$75 to <100K      | 5%                  | 5%                              |
| \$100K or more     | 38%                 | 40%                             |
| Don't know         | 25%                 | 24%                             |
| Employed           | 65%                 | 65%                             |
| Insurance          |                     |                                 |
| Public             | 52%                 | 50%                             |
| Private            | 48%                 | 50%                             |

NYU CHES: New York University Children's Health and Environment Study

Table S2. Prevalence of COVID-19 cases and testing among children age ≤18 years, NYU CHES, April 20-August 31, 2020 excluding those who responded after June 1 and who were living outside the NYC metropolitan area

|                          | N    | WHO<br>suspect<br>case | Healthcare<br>diagnosed | Tested<br>positive <sup>a</sup> | Case by<br>any<br>method <sup>b</sup> | Tested <sup>a</sup> | Positive<br>test rate <sup>a c</sup> |
|--------------------------|------|------------------------|-------------------------|---------------------------------|---------------------------------------|---------------------|--------------------------------------|
| Total                    | 1889 | 99                     | 53                      | 4                               | 130                                   | 37                  | 10.8%                                |
| Child age (years)        |      |                        |                         |                                 |                                       |                     |                                      |
| <1                       | 351  | 15 (4.3)               | 13 (3.8)                | 2 (0.6)                         | 21 (6.0)                              | 11 (3.1)            | 18.2%                                |
| 1 to 3                   | 774  | 46 (5.9)               | 26 (3.4)                | 0 (0.0)                         | 61 (7.9)                              | 11 (1.4)            | 0.0%                                 |
| 4 to 9                   | 443  | 22 (5.0)               | 7 (1.6)                 | 0 (0.0)                         | 26 (5.9)                              | 8 (1.8)             | 0.0%                                 |
| 10 to 18                 | 275  | 16 (5.8)               | 5 (1.8)                 | 2 (0.7)                         | 20 (7.3)                              | 7 (2.6)             | 28.6%                                |
| <i>p</i> -value          |      | 0.66                   | 0.14                    | 0.047                           | 0.50                                  | 0.25                | 0.25                                 |
| Women's race/ethnicity   |      |                        |                         |                                 |                                       |                     |                                      |
| Hispanic                 | 1174 | 53 (4.5)               | 21 (1.8)                | 3 (0.3)                         | 67 (5.7)                              | 25 (2.1)            | 12.0%                                |
| Non-Hispanic White       | 449  | 33 (7.4)               | 24 (5.4)                | 0 (0.0)                         | 48 (10.7)                             | 5 (1.1)             | 0.0%                                 |
| Non-Hispanic Black       | 83   | 2 (2.4)                | 3 (3.7)                 | 0 (0.0)                         | 3 (3.6)                               | 2 (2.4)             | 0.0%                                 |
| Non-Hispanic Asian       | 135  | 7 (5.2)                | 3 (2.2)                 | 1 (0.7)                         | 7 (5.2)                               | 5 (3.7)             | 20.0%                                |
| Other/Multiple           | 45   | 4 (8.9)                | 2 (4.7)                 | 0 (0.0)                         | 5 (11.1)                              | 0 (0.0)             | 0.0%                                 |
| <i>p</i> -value          |      | 0.099                  | 0.003                   | 0.54                            | 0.003                                 | 0.29                | 0.89                                 |
| Insurance type           |      |                        |                         |                                 |                                       |                     |                                      |
| Public                   | 1191 | 52 (4.4)               | 15 (1.3)                | 2 (0.2)                         | 61 (5.1)                              | 23 (1.9)            | 8.7%                                 |
| Private                  | 678  | 47 (6.9)               | 38 (5.7)                | 2 (0.3)                         | 69 (10.2)                             | 13 (1.9)            | 15.4%                                |
| <i>p</i> -value          |      | 0.02                   | <0.0001                 | 0.57                            | <0.0001                               | 0.98                | 0.59                                 |
| Annual household income  |      |                        |                         |                                 |                                       |                     |                                      |
| <\$30,000                | 444  | 14 (3.2)               | 5 (1.1)                 | 2 (0.5)                         | 19 (4.3)                              | 12 (2.7)            | 16.7%                                |
| \$30,000 to \$100,000    | 317  | 22 (6.9)               | 12 (3.8)                | 0 (0.0)                         | 28 (8.8)                              | 7 (2.2)             | 0.0%                                 |
| ≥\$100,000               | 487  | 38 (7.8)               | 29 (6.0)                | 1 (0.2)                         | 54 (11.1)                             | 6 (1.2)             | 16.7%                                |
| Don't know               | 569  | 21 (3.7)               | 6 (1.1)                 | 1 (0.2)                         | 24 (4.2)                              | 12 (2.1)            | 8.3%                                 |
| <i>p</i> -value          |      | 0.002                  | <0.0001                 | 0.61                            | <0.0001                               | 0.45                | 0.73                                 |
| Women's education        |      |                        |                         |                                 |                                       |                     |                                      |
| High school or less      | 892  | 31 (3.5)               | 13 (1.5)                | 3 (0.3)                         | 39 (4.4)                              | 19 (2.1)            | 15.8%                                |
| Some college             | 272  | 16 (5.9)               | 8 (3.0)                 | 0 (0.0)                         | 20 (7.4)                              | 6 (2.2)             | 0.0%                                 |
| Bachelor's degree        | 323  | 13 (4.0)               | 7 (2.2)                 | 1 (0.3)                         | 17 (5.3)                              | 6 (1.9)             | 16.7%                                |
| Postgraduate degree      | 361  | 37 (10.3)              | 24 (6.7)                | 0 (0.0)                         | 51 (14.1)                             | 6 (1.7)             | 0.0%                                 |
| <i>p</i> -value          |      | <0.0001                | <0.0001                 | 0.55                            | <0.0001                               | 0.94                | 0.61                                 |
| Adult with high-risk job |      |                        |                         |                                 |                                       |                     |                                      |
| Yes                      | 401  | 25 (6.2)               | 16 (4.1)                | 2 (0.5)                         | 33 (8.2)                              | 6 (1.5)             | 33.3%                                |
| No                       | 1488 | 74 (5.0)               | 37 (2.5)                | 2 (0.1)                         | 97 (6.5)                              | 31 (2.1)            | 6.5%                                 |
| <i>p</i> -value          |      | 0.31                   | 0.10                    | 0.16                            | 0.23                                  | 0.45                | 0.11                                 |

Unless otherwise specified, data reported as N (row %)

<sup>a</sup> polymerase chain reaction or antibody testing

<sup>b</sup> met WHO criteria, were diagnosed by a healthcare provider, or tested positive

<sup>c</sup> (# tested positive)/(# tested)

a. Children diagnosed via WHO suspect case criteria (n=138).

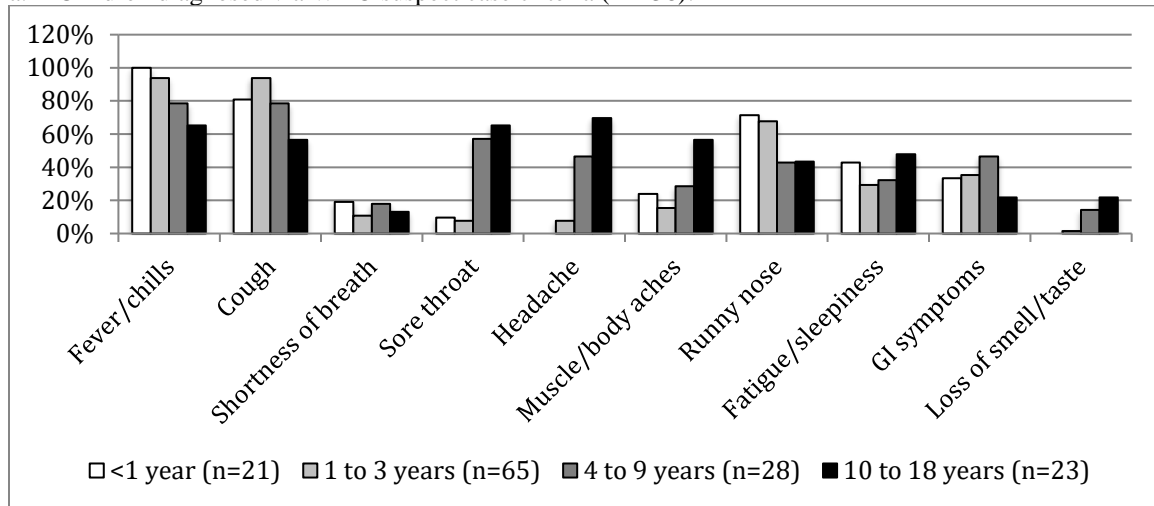

b. Children diagnosed by a healthcare provider (n=77).

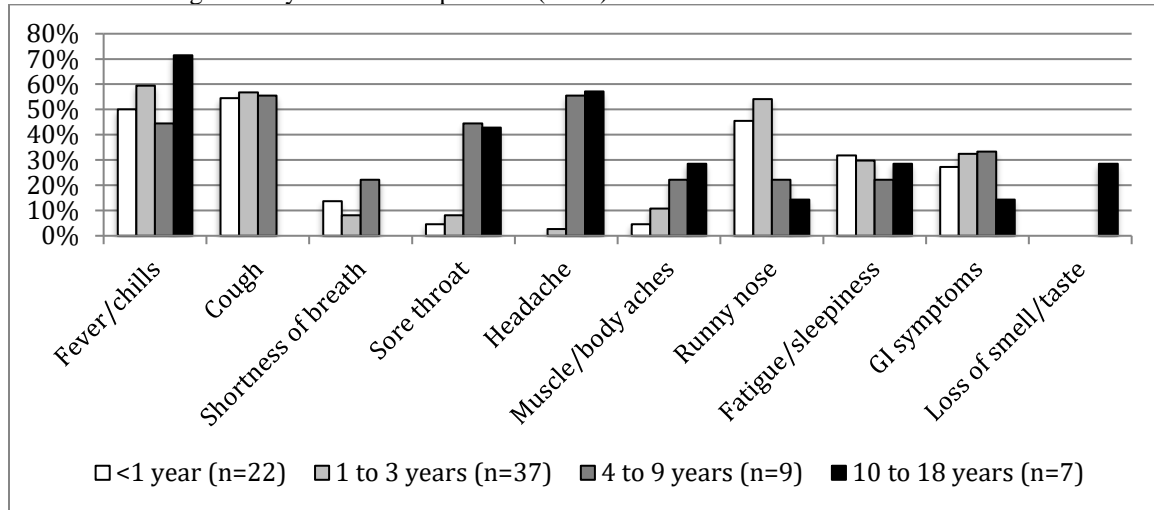

c. Children who tested positive (n=12).

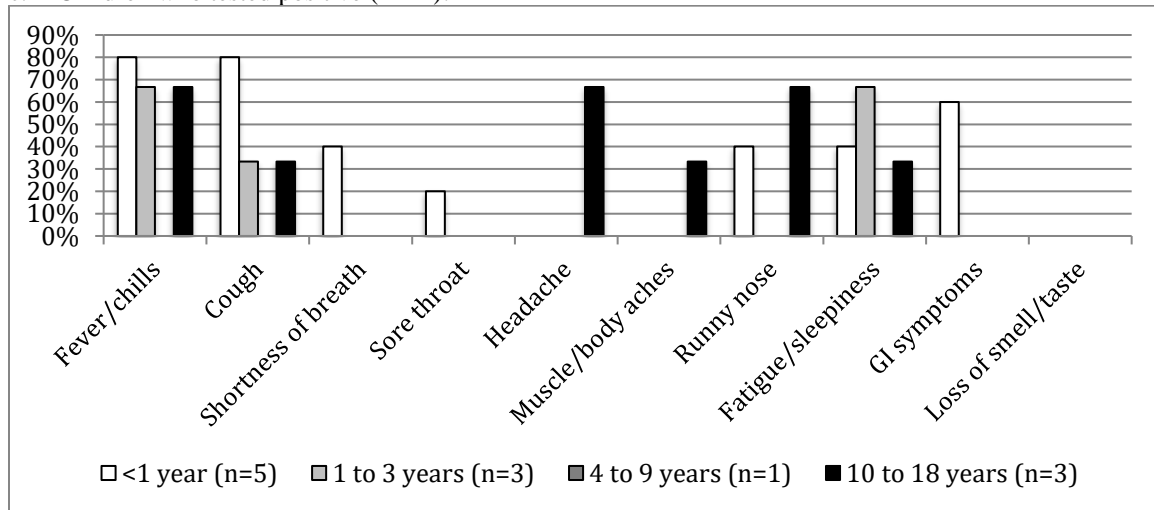

d. Children without a diagnosis (n=2509).

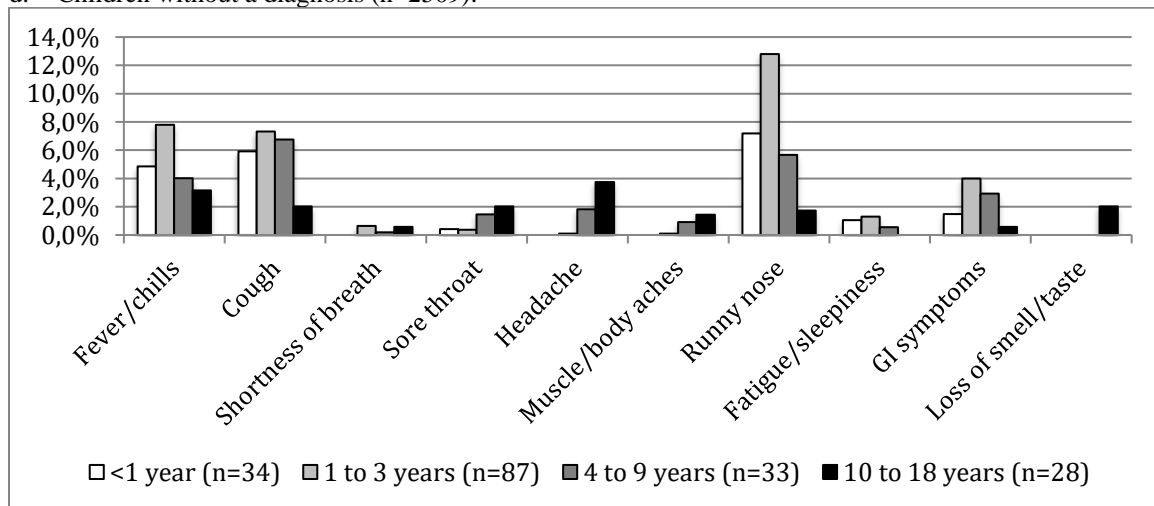

e. Children with and without diagnoses, all age groups combined.

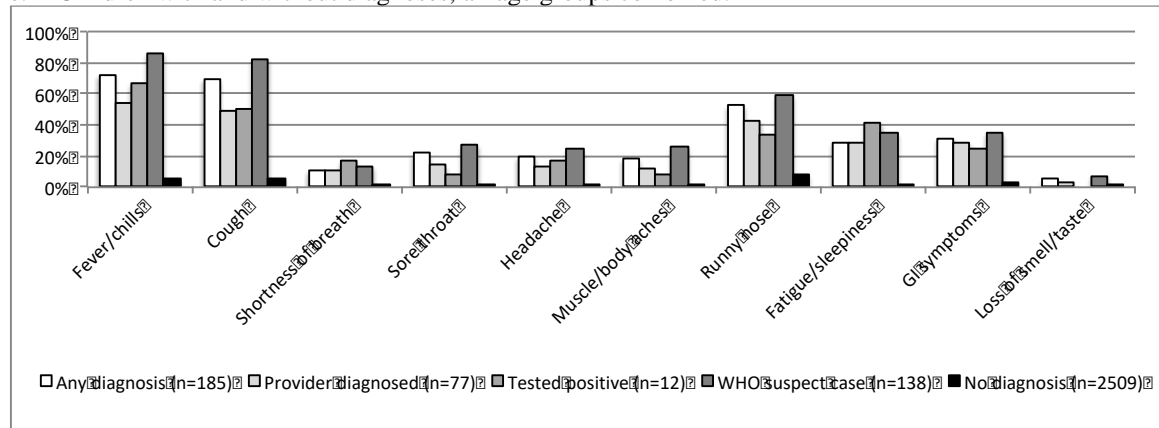

Figure S1. Reported symptoms among children in NYU CHES, April 20-August 31, 2020.
